# Supplementary material for: Systematic preclinical evaluation of CD33-directed chimeric antigen receptor T cell immunotherapy for acute myeloid leukemia defines optimized construct design
Source: HighWire-hosted journal article supplement (doi:10.1136/jitc-2021-003149), 2021-09-01
Supplement: jitc-2021-003149supp001_data_supplement.pdf [file jitc-2021-003149supp001_data_supplement.pdf]

## SUPPLEMENTAL METHODS

### *CAR T cell production*

CD33 and CD123 CAR-encoding lentiviral vectors were produced by transient transfection of the lenti-X 293T packaging cell line. Briefly, lenti-X 293T cells were plated into poly-D lysine coated 15-centimeter plates (BD Biosciences). The following day, lenti-X 293T cells were transfected using lipofectamine 3000 (ThermoFisher Scientific) with plasmids encoding the CAR along with packaging and envelope vectors (pMDLg/pRRE, pMD-2G, and pRSV-Rev). Lentiviral supernatants were harvested at 24 and 48 hours post-transfection, centrifuged at 3000 RPM for 10 minutes to remove cell debris, frozen on dry ice and stored at -80°C. Human PBMCs from normal donors were obtained via an NIH-approved research protocol and activated with a 1:1 ratio of CD3/CD28 microbeads (CD3/CD28 human T-expander Dynabeads, Thermo Fisher Scientific, Cat# 11141D) in AIM-V media containing recombinant human IL-2 40 IU/mL and 5% fetal bovine serum (FBS) for 24 hours. Activated T cells were resuspended at 2 million cells in 2 mL of lentiviral supernatant plus 1 mL of fresh AIM-V media with protamine sulfate 10 mcg/mL and IL-2 100 IU/mL in 6-well plates. Plates were centrifuged at 1000 x g for 2 hours at 32°C and incubated overnight at 37°C. A second transduction was performed on the following day by repeating the same transduction procedure described above. CD3/CD28 beads were removed on the third day following transduction, and cells were cultured at 300,000 cells/mL in AIM-V containing IL-2 100 IU/mL with fresh IL-2-containing media added every 2-3 days until cells were removed for analysis on day 8 or 9. Transduction efficiency for *in vivo* cell line xenograft and patient-derived xenograft (PDX) model studies shown in Figures 4 and 5 are listed in Supplemental Table 2.

Production of clinical-grade CD33CART used in Figure 7 was performed using CD4+/CD8+ T cells selected from a healthy donor apheresis using the Miltenyi Prodigy system. One hundred million selected T cells were activated with TransAct beads, then transduced at moi (multiplicity of infection) of 20 with clinical-grade CD33 CAR construct lentivirus manufactured at

the Children's Hospital of Philadelphia vector core facility. CD33CART cells were expanded for 7 days, formulated in CryoStor10, and cryopreserved using a controlled-rate freezer. CD33CART was tested for sterility and replication-competent lentivirus and confirmed to be free of *Mycoplasma* and other bacteria via Gram staining prior to cryopreservation.

#### *In vitro cytokine production assays of CD33CART*

Target tumor cells and transduced CAR+ T cells in a 1:1 ratio were washed 3 times with phosphate-buffered saline (PBS) and resuspend in RPMI culture medium at 1e6 cells/mL. 100ul of tumor cells with 100ul of CAR positive T cells were loaded into each well of a 96-well plate. T cell only and tumor cell only controls were set up. All tests were performed in duplicate or triplicate. Cells were incubated for 18 hours at 37°C, and 120 uL of the culture supernatant was removed for detection of cytokine production. Cytokine levels in supernatants were measured using either ELISA kits (R&D Systems) or a multiplex assay (Meso Scale Discovery) following the manufacturers' instructions.

#### *In vitro cytotoxicity assays of CD33CART*

To assess potential *in vitro* killing of AML cells by CD33CARTs, we performed CellTiter-Glo 3D cell viability assays (Promega) per the manufacturer's instructions. Luciferase-expressing human CD33+ AML (MOLM-14, MV4;11, U937) and CD33-negative B-ALL (NALM-6) cell lines were plated in RPMI/10% fetal bovine serum media alone or with irrelevant target GFP-transduced T cells [(-)TC], one of six experimental CD33CARTs, or one of two CD123CARTs (positive AML killing control) at 1:1 ratio in an opaque-walled and cell culture-treated 96-well plate format and incubated at 37°C with 5% CO<sub>2</sub>. Each condition was tested with CAR T cells produced from 2 different normal T cell donors in at least 4 technical replicates. Luminescence was measured with a Synergy 2 multi-detection plate reader (BioTek) on individual plates every 24 hours for 96 hours. Data were normalized to baseline (day 0) leukemia cell-only luminescence

readings for each cell line, and the percentage of cell killing at each time point was calculated and displayed graphically in Prism.

#### *In vivo animal studies of CD33CART*

All animal studies were conducted on Institutional Animal Care and Use Committee (IACUC)-approved research protocols. GFP/luciferase-expressing (+) AML cell lines and xenografted primary human AML specimens were injected IV into NSG and busulfan-conditioned NSGS mice, respectively. Luciferase+ AML cell line xenograft models in NSG mice were followed by bioluminescent imaging using the Xenogen IVIS Lumina (Caliper Life Sciences or Perkin-Elmer) for quantification of baseline and post-CD33CART treatment leukemia burden. NSG mice were injected intraperitoneally with 3 mg D-luciferin (Caliper Life Sciences) and imaged 4 minutes later with an exposure time of 1 minute. Living Image Version 4.1 software (Caliper Life Sciences) was used to analyze the total bioluminescent signal flux for each mouse as photons/second. For all experiments, mice were randomly assigned to treatment groups prior to administration of CAR T cells. At study termination, murine bone marrow, spleen, and/or liver were harvested for quantification of human AML and CD33CART cells by flow cytometry or immunohistochemical analysis as described.<sup>41,42</sup> With the exception of experiments which were terminated early for tissue analysis as indicated, xenograft mice were generally followed for quantification of leukemia and T cell counts for 40-60 days. Animals were sacrificed at a pre-determined study endpoint or if development of xenogeneic GVHD necessitated euthanasia as per IACUC guidelines. Some MOLM14 xenograft studies were followed for 6 months post-CD33CART treatment. In some studies, CD33CARTs were prestimulated/activated with Dynabeads (Invitrogen/Thermo Fisher) or TransAct beads (Miltenyi) according to manufacturer's instructions.

Pediatric AML PDX models were created as previously described.<sup>41,42</sup> Briefly, 6-8 week-old male or female NSGS mice were conditioned with 30 mg/kg busulfan intraperitoneally at 24 hours prior to IV injection of 2.5 million human AML cells harvested from spleens of secondary

PDX models. Once mice demonstrated at least 1% human CD45+ CD33+ AML cells in peripheral blood by flow cytometry, they were treated IV with saline,  $1 \times 10^6$  (-)TC, or  $1 \times 10^6$  of one of six CD33CARTs (a cell dose previously optimized in previously established preclinical CAR studies)<sup>42</sup> and followed by weekly retro-orbital venous bleeding for flow cytometric quantification of human CD45+ CD33+ AML cells and CD3+ CAR T cells. Studies were terminated and animals sacrificed after 3-8 weeks depending upon the rate of AML progression in saline-treated control animals.

#### *Flow cytometry analyses*

Human AML and CAR T cells were quantified by flow cytometry analysis of harvested end-study organs from PDX mice using a BD FACSVerser flow cytometer and FlowJo (TreeStar) or Cytobank analysis with data display and statistical analysis in Prism as described.<sup>41,42</sup> Human CD45-APC, CD33-PE, and CD3-V450 antibodies (all from EBioscience/ThermoFisher) were used for detection of AML and CAR T cells in xenograft mice. AML cell line and PDX cell CD33 and CD123 site density quantification utilized CD33-PE or CD123-PE antibodies (EBioscience) and CountBright beads (Invitrogen). Additional T cell immunophenotyping was performed using CD4, CD8, CD25, CD71, PD-1, CCR7 (CD197), and CD45RA (all from EBioscience), Tim-3 (Biolegend), and LAG-3 (R&D Systems) antibodies.

**SUPPLEMENTAL TABLES**

**Supplemental Table 1. CD33 CAR transduction efficiency for *in vivo* cell line and patient-derived xenograft experiments shown in Figures 4 and 5 and Supplemental Figure 2.**

| CAR T cell type              | Transduction efficiency (%) |
|------------------------------|-----------------------------|
| GFP negative control [(-)TC] | 88.3                        |
| gemtuzumab CD28/CD3 $\zeta$  | 31.6                        |
| gemtuzumab 4-1BB/CD3 $\zeta$ | 19.9                        |
| lintuzumab CD28/CD3 $\zeta$  | 68.3                        |
| lintuzumab 4-1BB/CD3 $\zeta$ | 78.4                        |
| M195 CD28/CD3 $\zeta$        | 49.4                        |
| M195 4-1BB/CD3 $\zeta$       | 72                          |

**Supplemental Table 2. CD33 genotypes of AML cell lines.** Assessment of CD33 rs12459419 single nucleotide polymorphisms on human AML cell lines used in *in vitro* and *in vivo* studies was performed using polymerase chain reaction as described.<sup>48,49</sup>

| AML cell line | CD33 genotype |
|---------------|---------------|
| MOLM14        | CC            |
| MV4;11        | CT            |
| THP-1         | CC            |
| U937          | CT            |

## SUPPLEMENTAL FIGURES

### **Supplemental Figure 1. Induction of activation markers on CD33CARTs varies as a function of CD33 single-chain variable fragments and co-stimulatory domains. (A)**

Expression of the CD25 (IL-2R $\alpha$ ) subunit was evaluated on CD4+CAR+ and CD8+CAR+ T cells on day 7 of expansion. CD123CARTs were used as positive AML killing controls. **(B)** Expression of the CD71 transferrin receptor was evaluated as in panel A. Representative histograms of T cells expressing the indicated CARs are presented (one of two independent T cell donors).

### **Supplemental Figure 2. *In vivo* dose titration of CD28/CD3 $\zeta$ -based CD33CARTs in MOLM14**

**xenograft model.** Luciferase-transduced MOLM14 cells ( $1 \times 10^6$ ) were injected IV via tail vein into NSG mice on Day 0 as in Figure 3. Once engraftment was documented by bioluminescent imaging (BLI) on Day 7, mice were randomized to IV treatment with saline, GFP-transduced T cells [(-)TC], or one of the CD33CARTs as designated (at  $1 \times 10^6$ ,  $5 \times 10^6$ , or  $1 \times 10^7$  total cells/mouse). Mice were followed by weekly BLI and sacrificed when a pre-determined maximal radiance level of  $1 \times 10^{10}$  photons/s/cm<sup>2</sup>/sr was detected, indicative of leukemia progression. Subcurative anti-leukemia effects were observed at lowest cell dosing of all three gemtuzumab- (gem), lintuzumab- (lin), and M195-based CD33CARTs. Curative effects of gem- and lin-CD33CARTs were seen with higher cell dosing, while M195-CD33CARTs were not effective even with highest cell dosing tested. 28z = CD28/CD3 $\zeta$  endodomains.

### **Supplemental Figure 3. *In vivo* assessment of CD33CARTs in MV4;11 xenograft model.**

Experiments were conducted as in Supplemental Figure 3 using  $1 \times 10^6$  luciferase-transduced MV4;11 cells injected into NSG mice (day 0) and injected with  $5 \times 10^6$  CD33CARTs on day 19 after AML engraftment and followed by bioluminescent imaging. Gemtuzumab (gem)-based CD33CARTs were ineffective at leukemia eradication. The lintuzumab (lin)-CD28/CD3 $\zeta$

CD33CART was moderately more effective than the lintuzumab-4-1BB/CD3 $\zeta$  CD33CART in this model, although neither was curative against this relatively CD33-dim AML cell line. 28z = CD28/CD3 $\zeta$  endodomains, BBz = 4-1BB/CD3 $\zeta$  endodomains. X = deceased animal.

**Supplemental Figure 4. *In vivo* assessment of CD33CARTs in THP-1 xenograft model.**

Experiments were conducted as in Supplemental Figures 3 and 4 using  $1 \times 10^6$  luciferase-transduced THP-1 cells injected into NSG mice (day 0) and injected with  $5 \times 10^6$  CD33CARTs on day 15 after AML engraftment and followed by bioluminescent imaging. Gemtuzumab (gem)-based CD33CARTs were partially effective at leukemia eradication. Best inhibition of leukemia proliferation was again observed with the lintuzumab (lin)-CD28/CD3 $\zeta$  CD33CART in the CD33-bright THP-1 AML cell line. 28z = CD28/CD3 $\zeta$  endodomains, BBz = 4-1BB/CD3 $\zeta$  endodomains.

**Supplemental Figure 5. *In vivo* activity of CD33CARTs against MOLM14.**

Studies were performed as in Figure 4 using three different normal T cell donors. **(A)** Lintuzumab-CD28/CD3 $\zeta$  (lin-28z) or lintuzumab-4-1BB/CD3 $\zeta$  (lin-BBz) CD33CART were cultured *in vitro* in the absence (-) or presence (+) of CD33+ MOLM14 cells for 24 hours. Representative plots showing staining of CD33CARTs with a recombinant CD33 Fc fusion protein antibody are shown with indicated percentages of positively-stained cells in each quadrant (left). The mean fluorescence intensity of CD33CART staining in the absence or presence of antigen is presented for 3 independent donors. Means are indicated by horizontal lines. **(B)** CD33CARTs were co-cultured with GFP/luciferase+ MOLM14 cells at a 1:1 ratio for 24 hour as in panel A. Representative dot plots showing the percentages of CD33CART cells relative to GFP+ AML are shown for one representative donor. **(C)** Induction of CD25 surface expression on CD33CARTs co-incubated without (-) and with (+) MOLM14 cells for 24 hours was evaluated by flow cytometry analysis. Quantification of CD25+/CD4+ and CD25+/CD8+ CD33CART percentages are shown for a representative T cell

donor. **(D)** Similar assessment of CD71+/CD4+ and CD71+/CD8+ cells was also performed. **(E)** Summary data for (C) and (D) are shown in the lower panels (n=3 normal T cell donors) with statistical analysis by Student's t-test for each +/- MOLM14 pair comparison. \*p<0.05; \*\*p<0.01; \*\*\*p<0.001.
