# Supplementary material for: Systematic preclinical evaluation of CD33-directed chimeric antigen receptor T cell immunotherapy for acute myeloid leukemia defines optimized construct design
Source: PubMed Central journal article supplement — J Immunother Cancer. 2021 Sep 16;9(9):e003149. doi: 10.1136/jitc-2021-003149 (PMC8449984; doi:10.1136/jitc-2021-003149), 2021-09-16

**Supplemental Figure 1**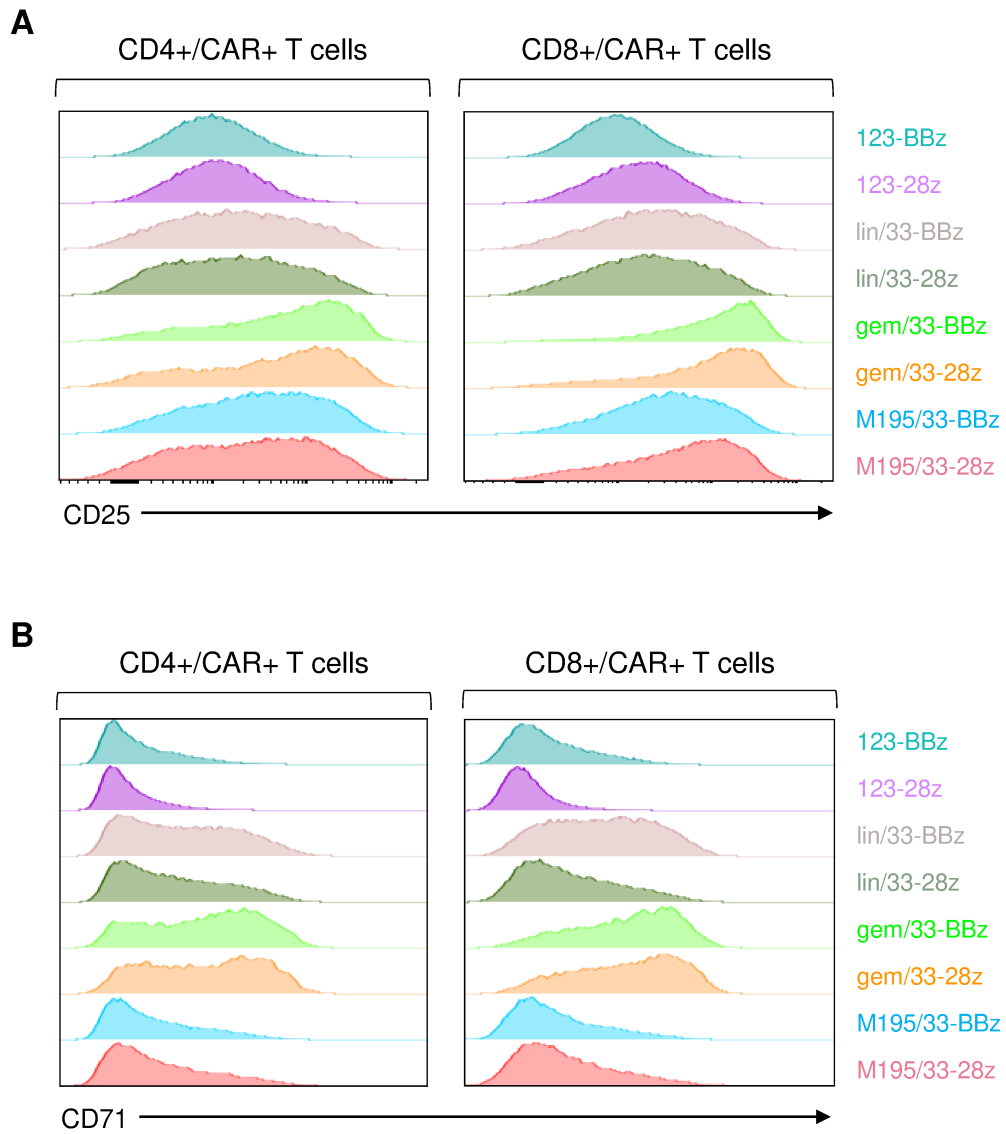

## Supplemental Figure 2

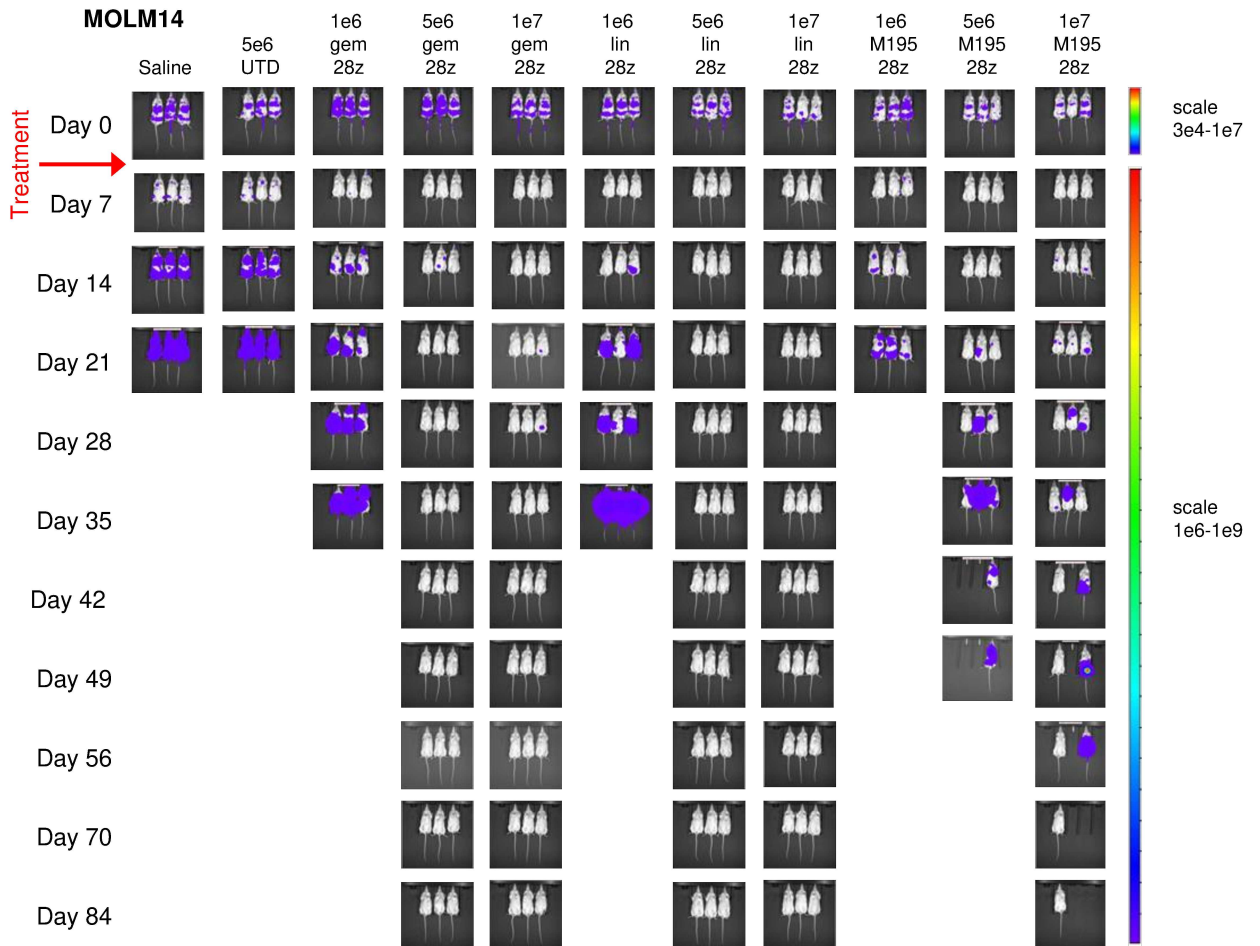

**Supplemental Figure 3**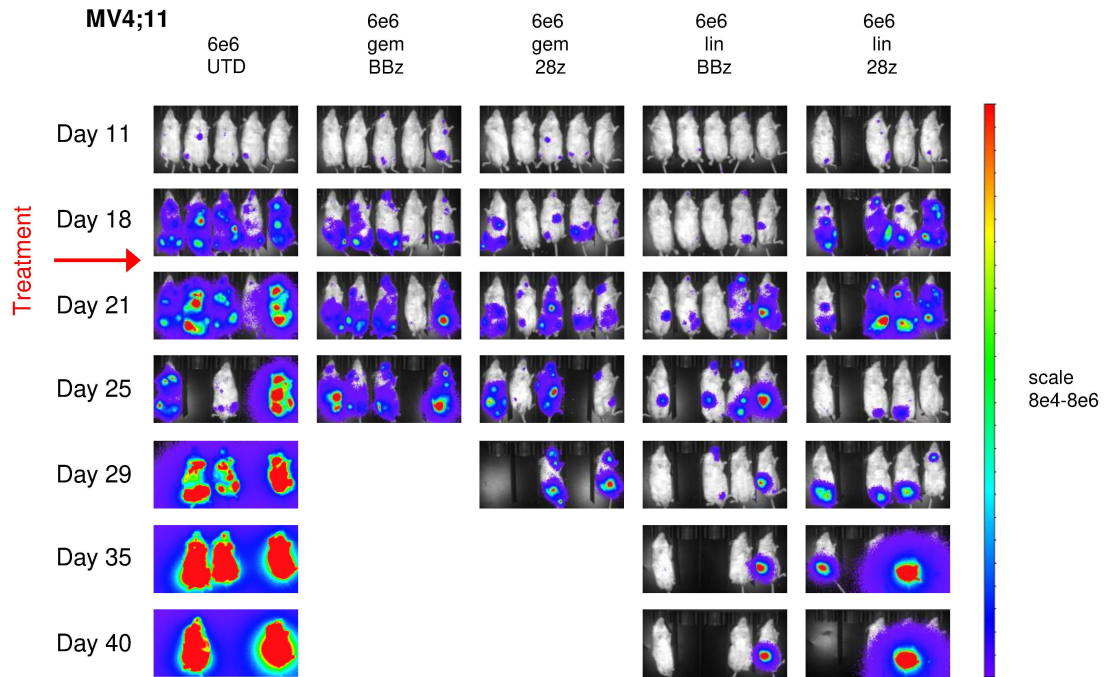

**Supplemental Figure 4**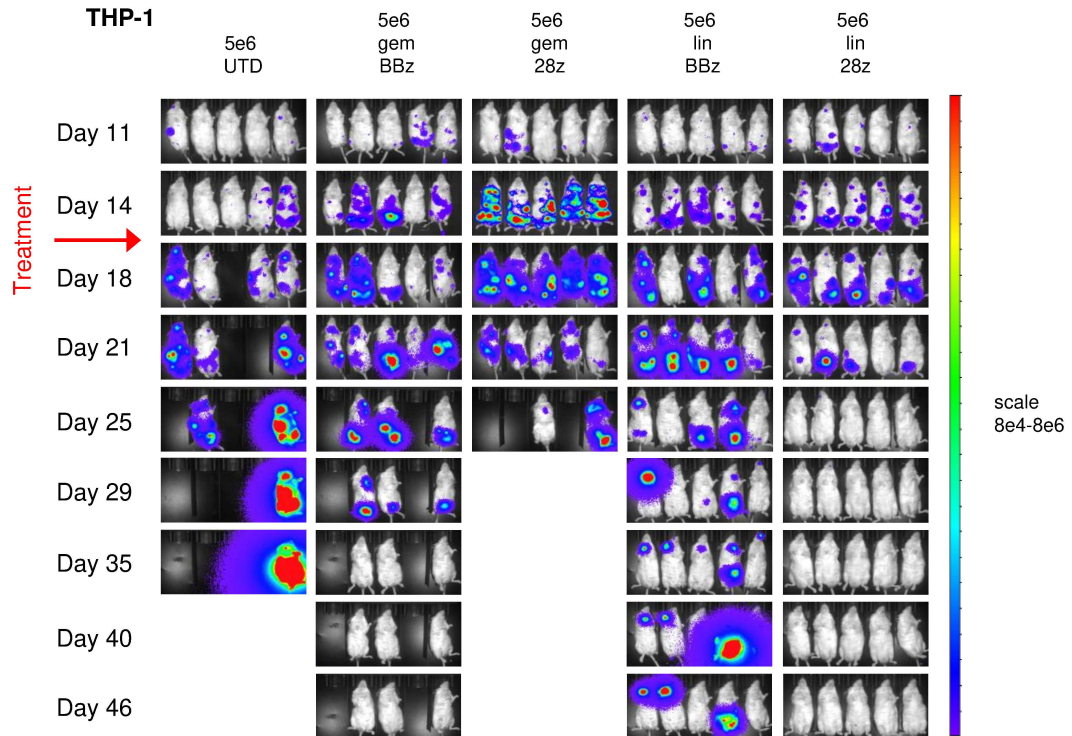

## Supplemental Figure 5

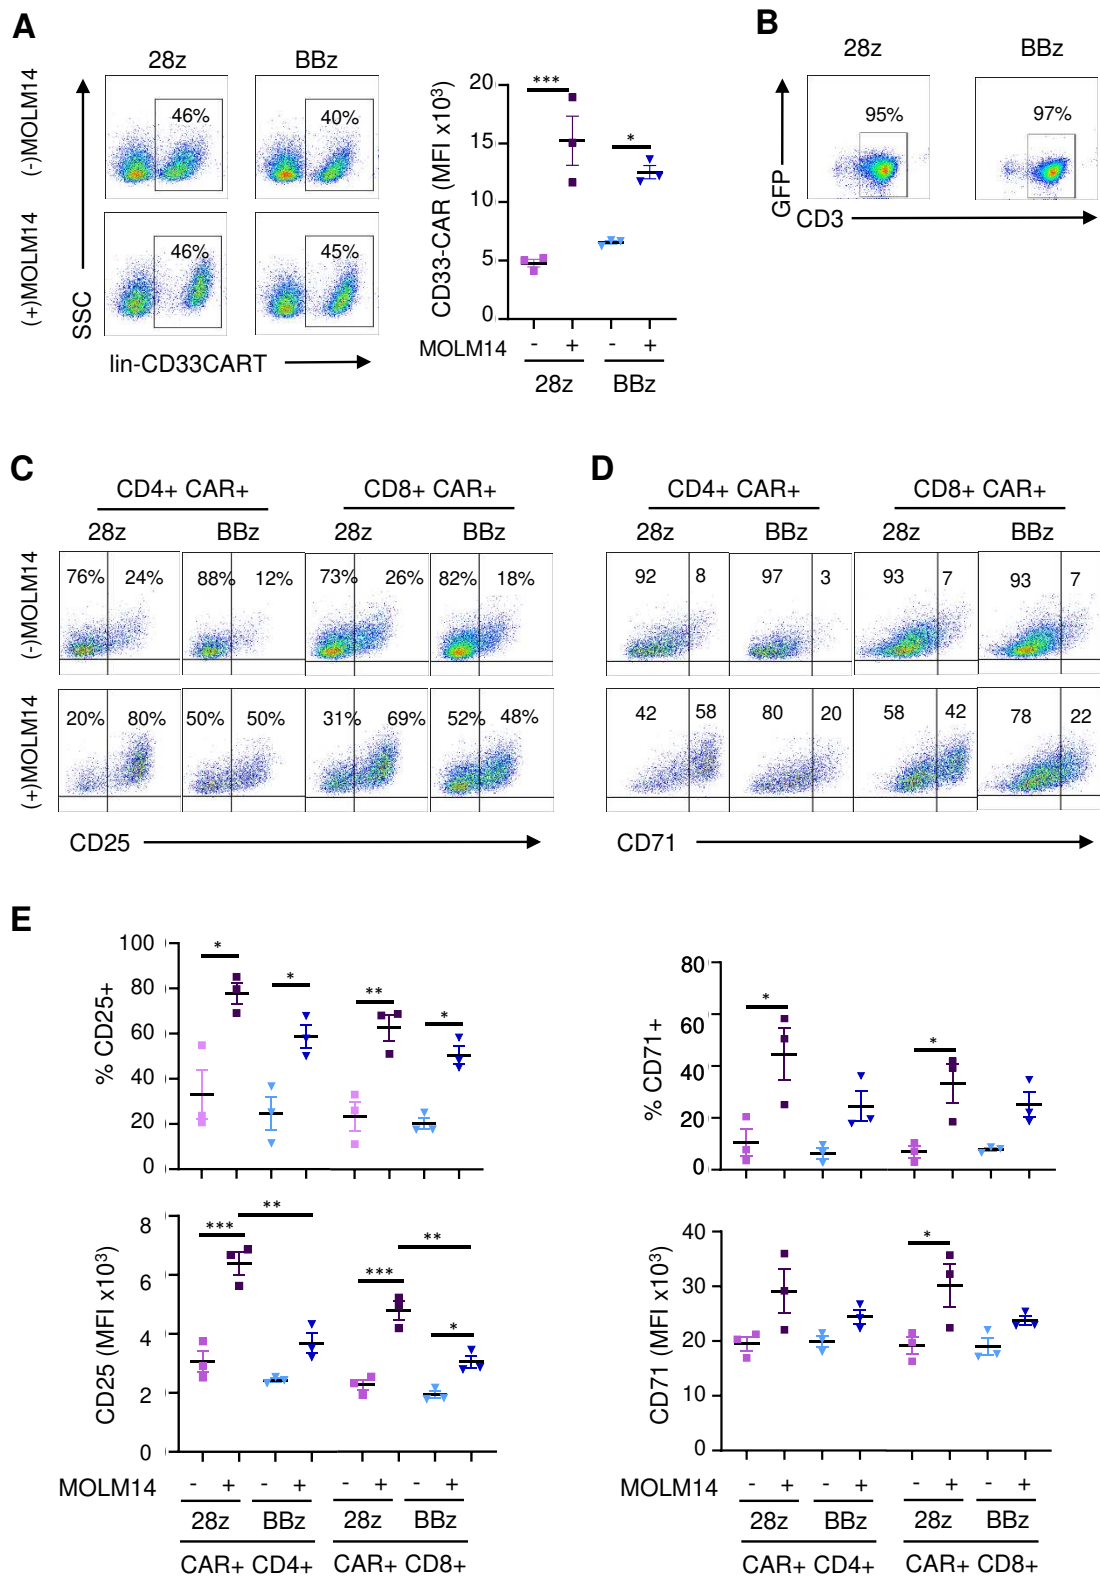

Supplement: jitc-2021-003149supp002.pdf [file jitc-2021-003149supp002.pdf]
