# Supplementary material for: Systematic preclinical evaluation of CD33-directed chimeric antigen receptor T cell immunotherapy for acute myeloid leukemia defines optimized construct design
Source: HighWire-hosted journal article supplement (doi:10.1136/jitc-2021-003149), 2021-09-01

**Supplemental Figure 1**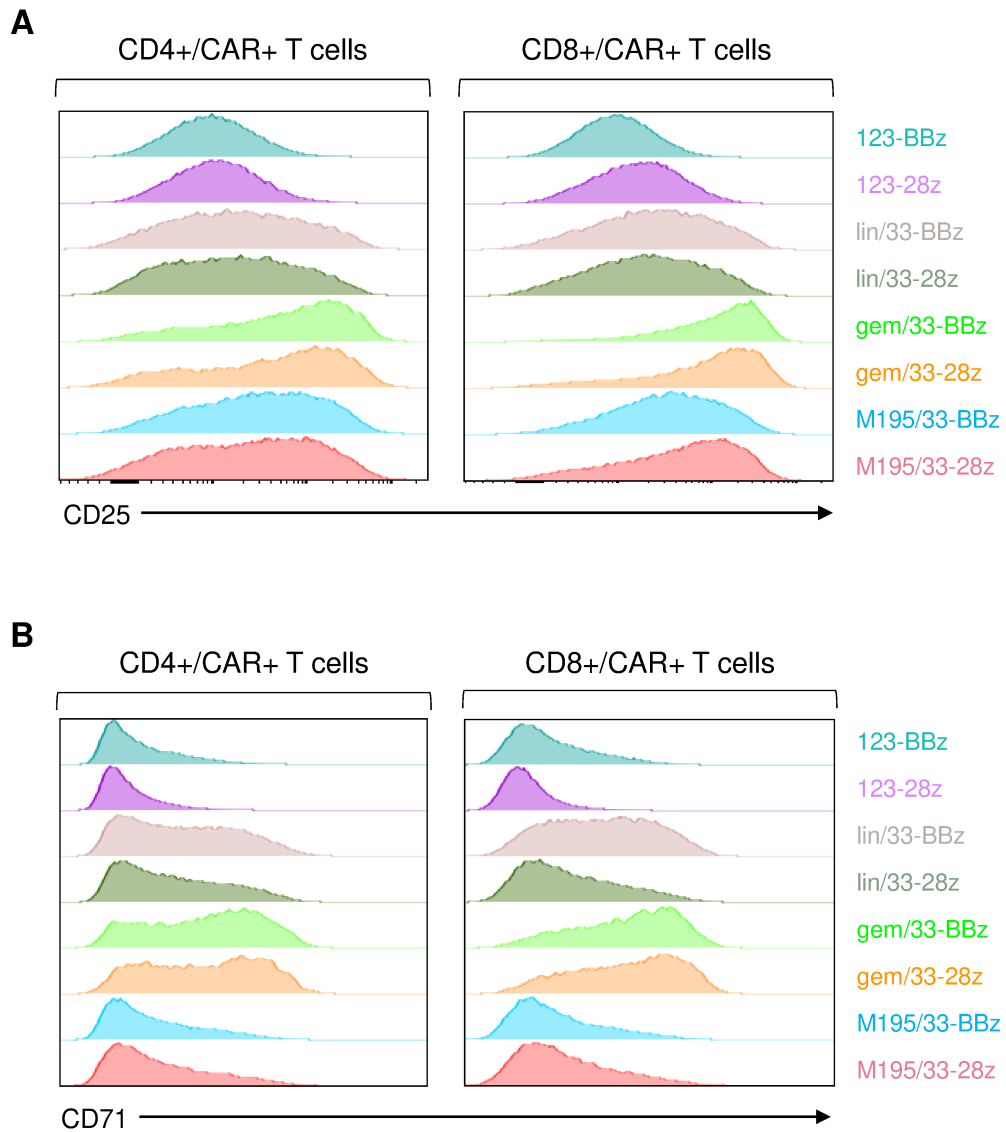

## Supplemental Figure 2

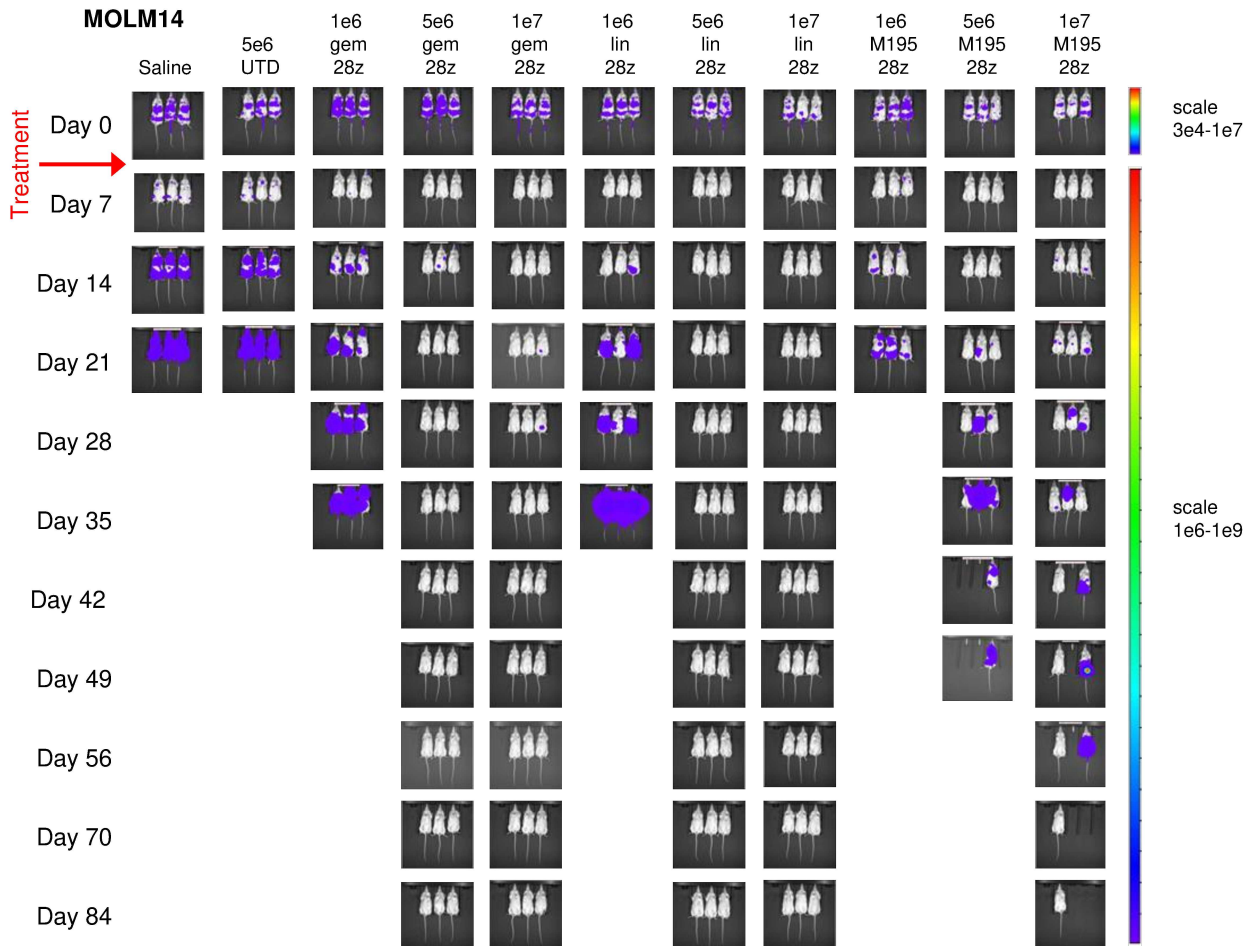

**Supplemental Figure 3**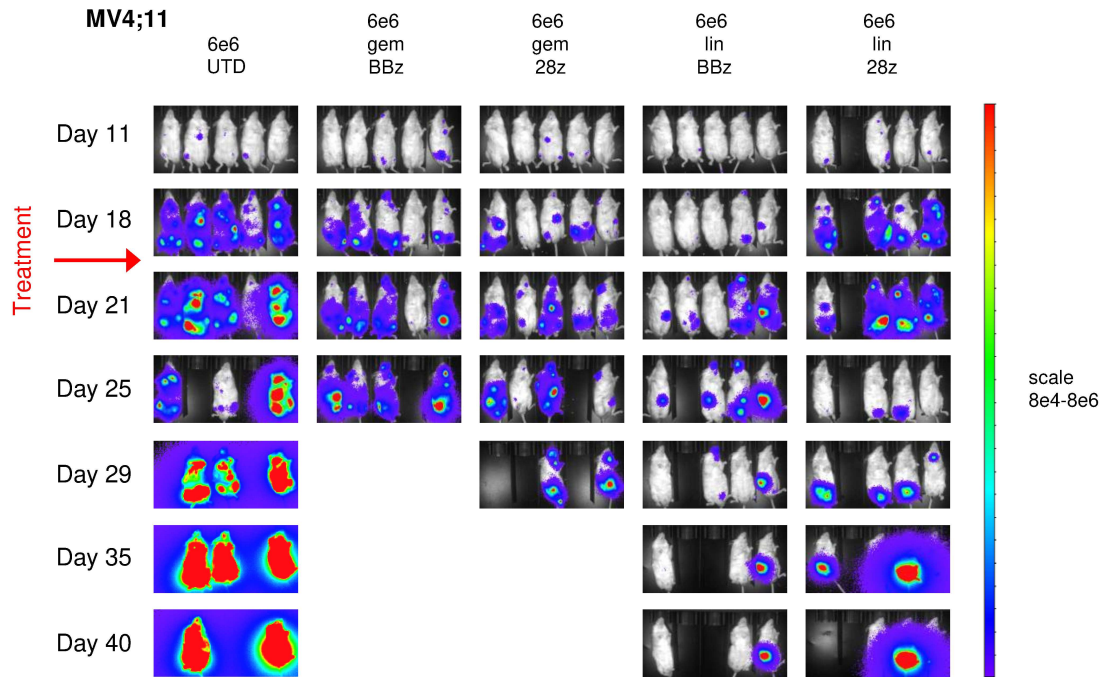

**Supplemental Figure 4**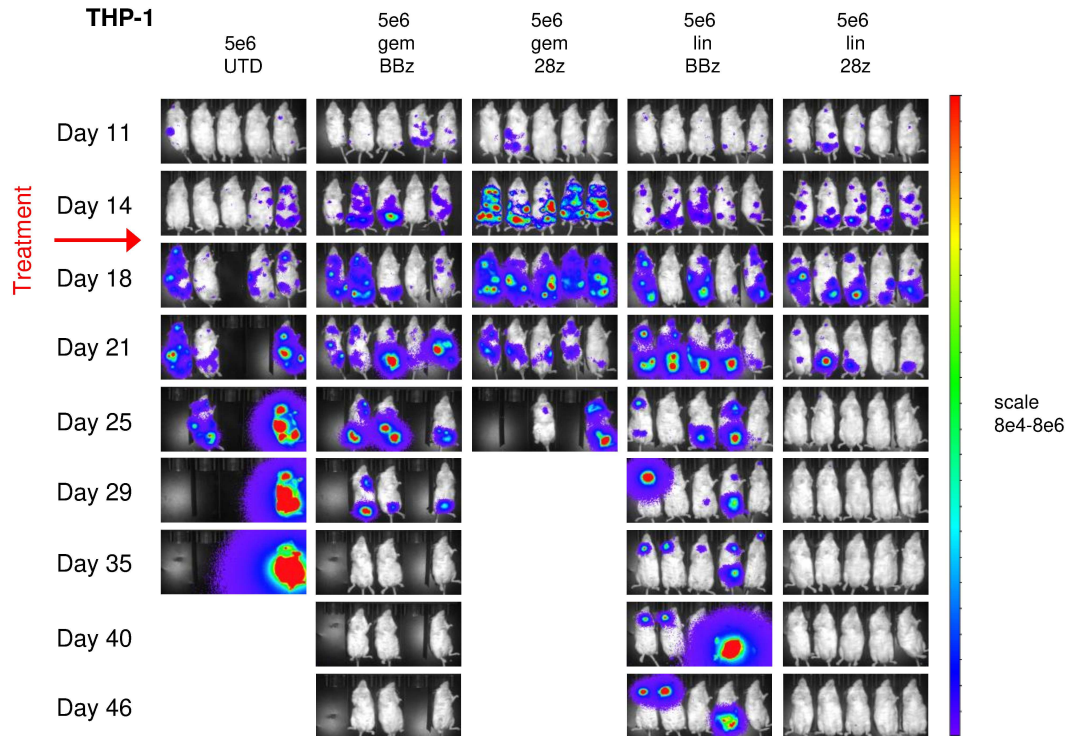

## Supplemental Figure 5

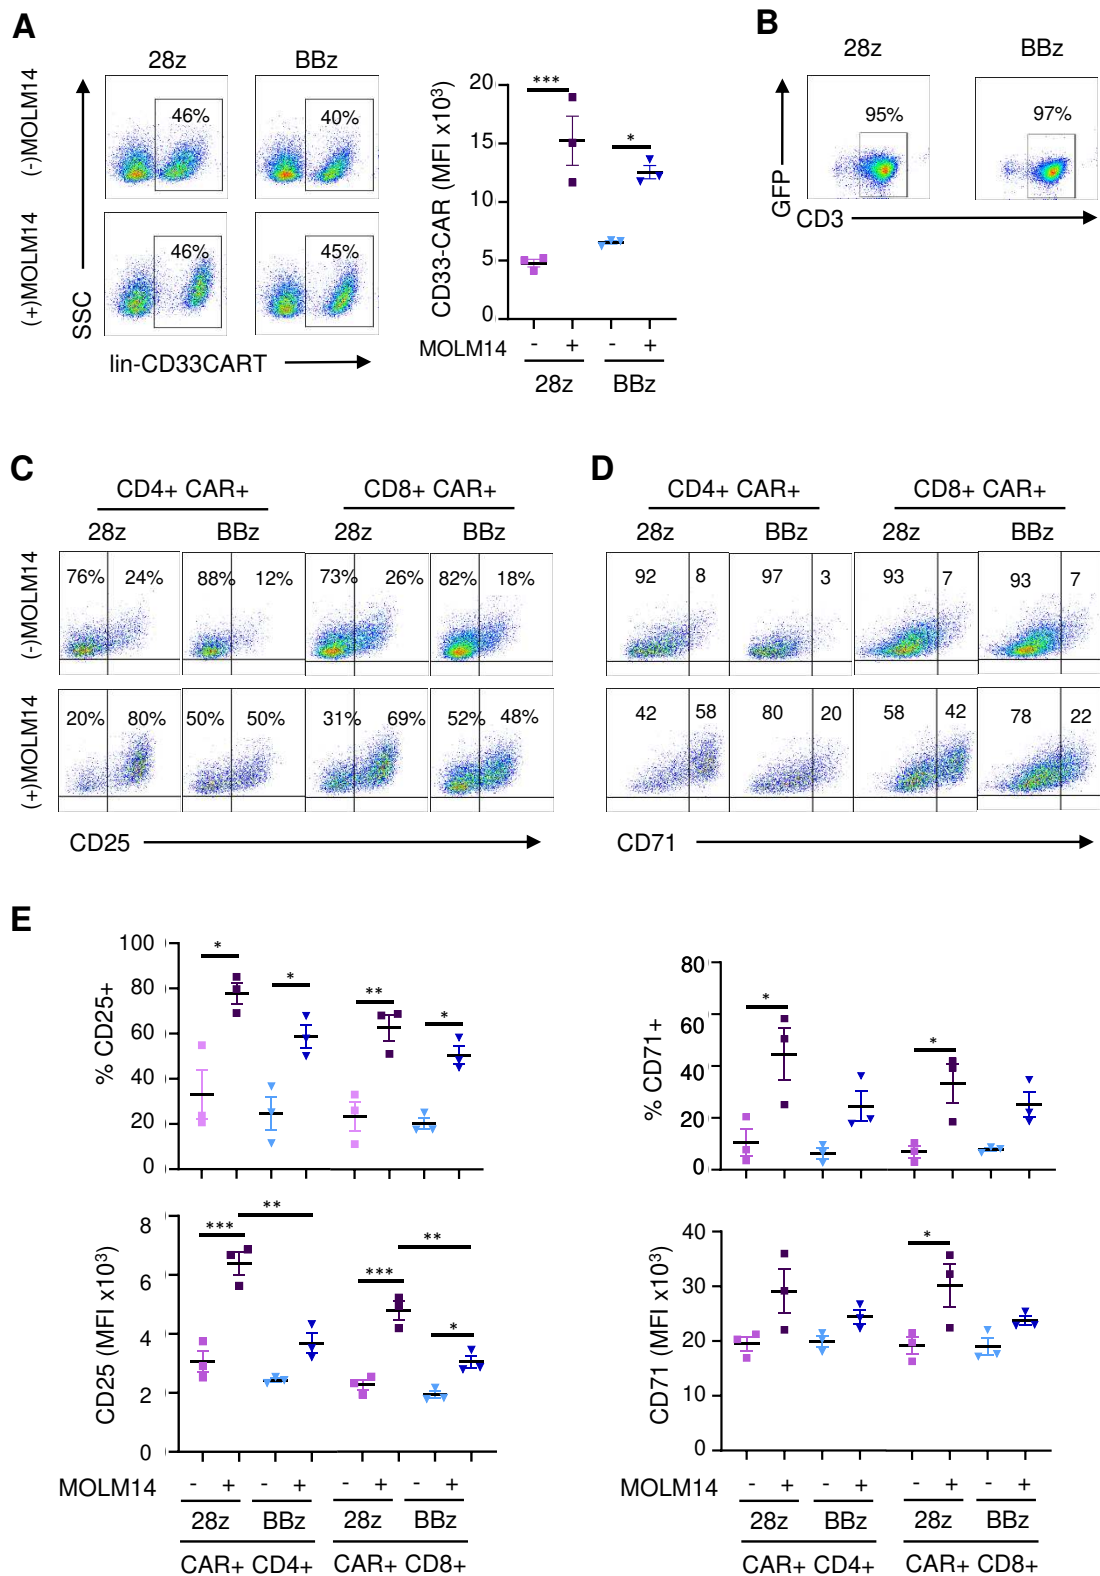

Supplement: jitc-2021-003149supp002_data_supplement.pdf [file jitc-2021-003149supp002_data_supplement.pdf]
